# Supplementary material for: Syntheses of 2-(trifluoromethyl)acrylate-containing block copolymers via RAFT polymerization using a universal chain transfer agent
Source: Royal Society of Chemistry journal article supplement (doi:10.1039/c8py00655e), 2018-01-01
Supplement: c8py00655e1.pdf [file c8py00655e1.pdf]

**Electronic Supplementary Information**

**Syntheses of 2-(trifluoromethyl)acrylate-containing Block  
Copolymers via RAFT Polymerization using a Universal Chain  
Transfer Agent**

Sanjib Banerjee<sup>\*a</sup> Marc Guerre,<sup>b</sup> Bruno Améduri<sup>b</sup> and Vincent Ladmiral<sup>\*b</sup>

<sup>a</sup>Department of Chemistry, Indian Institute of Technology Bhilai, Raipur 492015, Chhattisgarh,  
India

<sup>b</sup>ICGM, Univ Montpellier, CNRS, ENSCM, Montpellier, France.

\*Corresponding Authors: E-mail: [vincent.ladmiral@enscm.fr](mailto:vincent.ladmiral@enscm.fr) (V.L.)

E-mail: [sanjib.banerjee@iitbhilai.ac.in](mailto:sanjib.banerjee@iitbhilai.ac.in) (S.B.)

**Table S1** Reaction conditions and results of the RAFT copolymerizations of MAF-TBE and VAc in bulk at 40 °C in the presence of cyanomethyl-3,5-dimethyl 1H-pyrazole-1-carbodithioate (CDPCD).<sup>a</sup>

| entry | time<br>(h) | VAc conv <sup>b</sup><br>(% / no. of<br>moles) | MAF-TBE<br>conv <sup>c</sup><br>(% / no. of moles) | total<br>conv (%) | $M_{n,SEC}^d$<br>(g/mol) | $\bar{D}^d$ |
|-------|-------------|------------------------------------------------|----------------------------------------------------|-------------------|--------------------------|-------------|
| 1     | 1           | 7 / 2.8                                        | 6 / 2.4                                            | 7                 | 1300                     | 1.31        |
| 2     | 2           | 13 / 5.2                                       | 13 / 5.2                                           | 13                | 1900                     | 1.25        |
| 3     | 3           | 20 / 8.0                                       | 21 / 8.4                                           | 21                | 2700                     | 1.21        |
| 4     | 4           | 31 / 12.4                                      | 30 / 12.0                                          | 31                | 3500                     | 1.18        |
| 5     | 5           | 40 / 16.0                                      | 40 / 16.0                                          | 40                | 4200                     | 1.17        |
| 6     | 6           | 45 / 18.0                                      | 44 / 17.6                                          | 45                | 4800                     | 1.17        |
| 7     | 7           | 49 / 19.6                                      | 50 / 20.0                                          | 50                | 5400                     | 1.16        |
| 8     | 15          | 66 / 26.4                                      | 66 / 26.4                                          | 66                | 6600                     | 1.15        |
| 9     | 24          | 86 / 34.4                                      | 85 / 34.0                                          | 86                | 7900                     | 1.13        |

<sup>a</sup>Reaction Conditions: [VAc]<sub>0</sub>/[MAF-TBE]<sub>0</sub>/[CTA]<sub>0</sub>/[V-70]<sub>0</sub> = 15/15/1/0.1. <sup>b</sup>determined by <sup>1</sup>H NMR spectroscopy. <sup>c</sup>determined by <sup>19</sup>F NMR spectroscopy. <sup>d</sup>determined by SEC in DMF (containing 0.1 wt% LiCl), system was calibrated using PMMA standards.

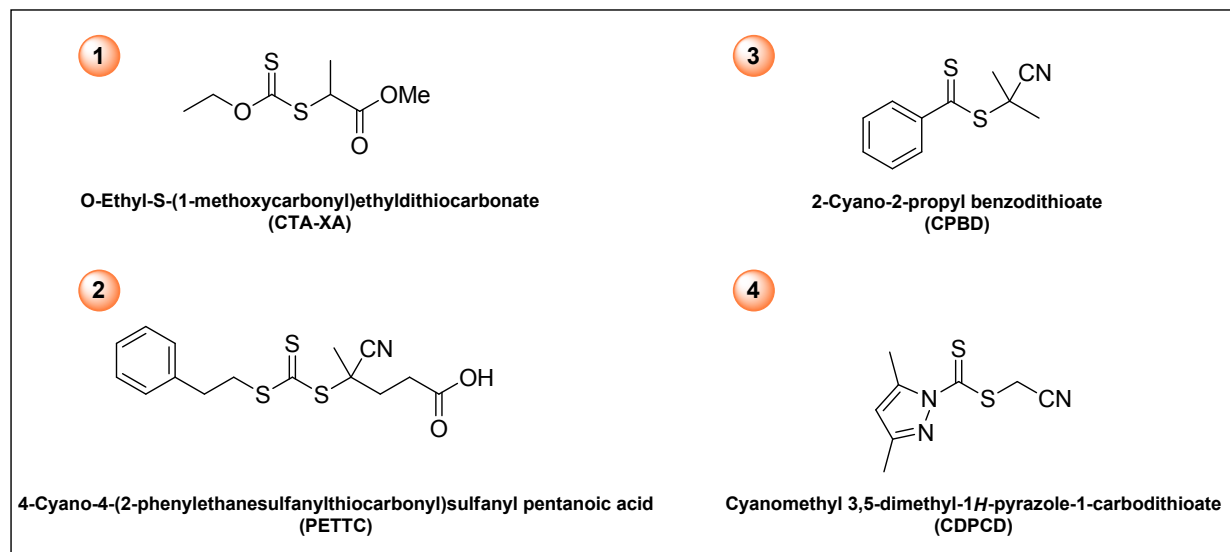

**Scheme S1** Chemical structures of the CTAs employed in this study.

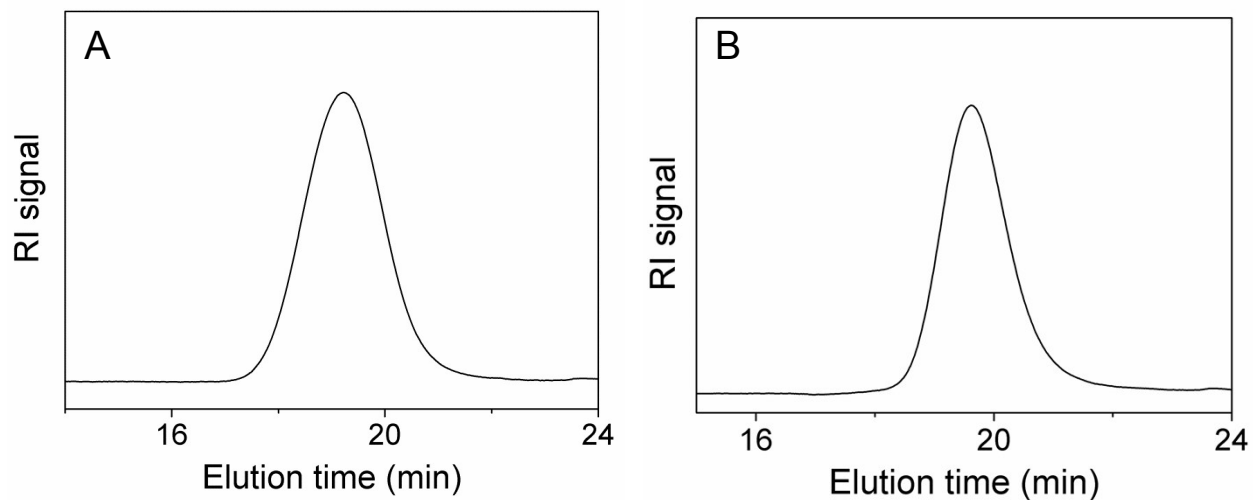

**Figure. S1** SEC traces of poly(VAc-*alt*-MAF-TBE) alternating copolymer prepared by RAFT copolymerization of VAc and MAF-TBE carried out at 40 °C in bulk using V-70 as initiator in the presence of: (A) CTA-XA (P1, Table 1) and (B) cyanomethyl-3,5-dimethyl 1H-pyrazole-1-carbodithioate (CDPCD) (P4, Table 1).

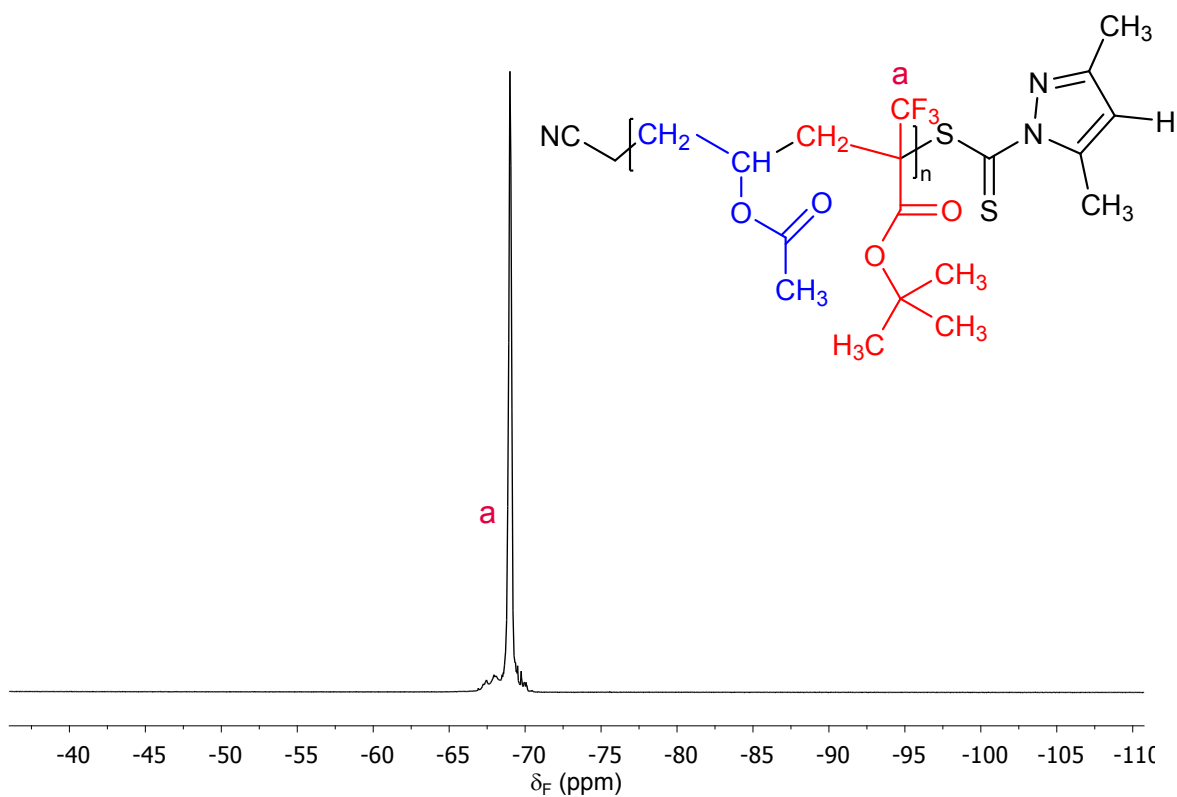

**Figure. S2**  $^{19}\text{F}$  NMR spectrum (recorded in  $\text{CDCl}_3$  at  $20^\circ\text{C}$ ) of poly(VAc-*alt*-MAF-TBE) alternating copolymer prepared by RAFT copolymerization of VAc and MAF-TBE ( $f_{\text{MAF-TBE}} = 0.5$ ) carried out at  $40^\circ\text{C}$  in bulk using V-70 as initiator in the presence of cyanomethyl-3,5-dimethyl 1H-pyrazole-1-carbodithioate (CDPCD) (P4, Table 1).

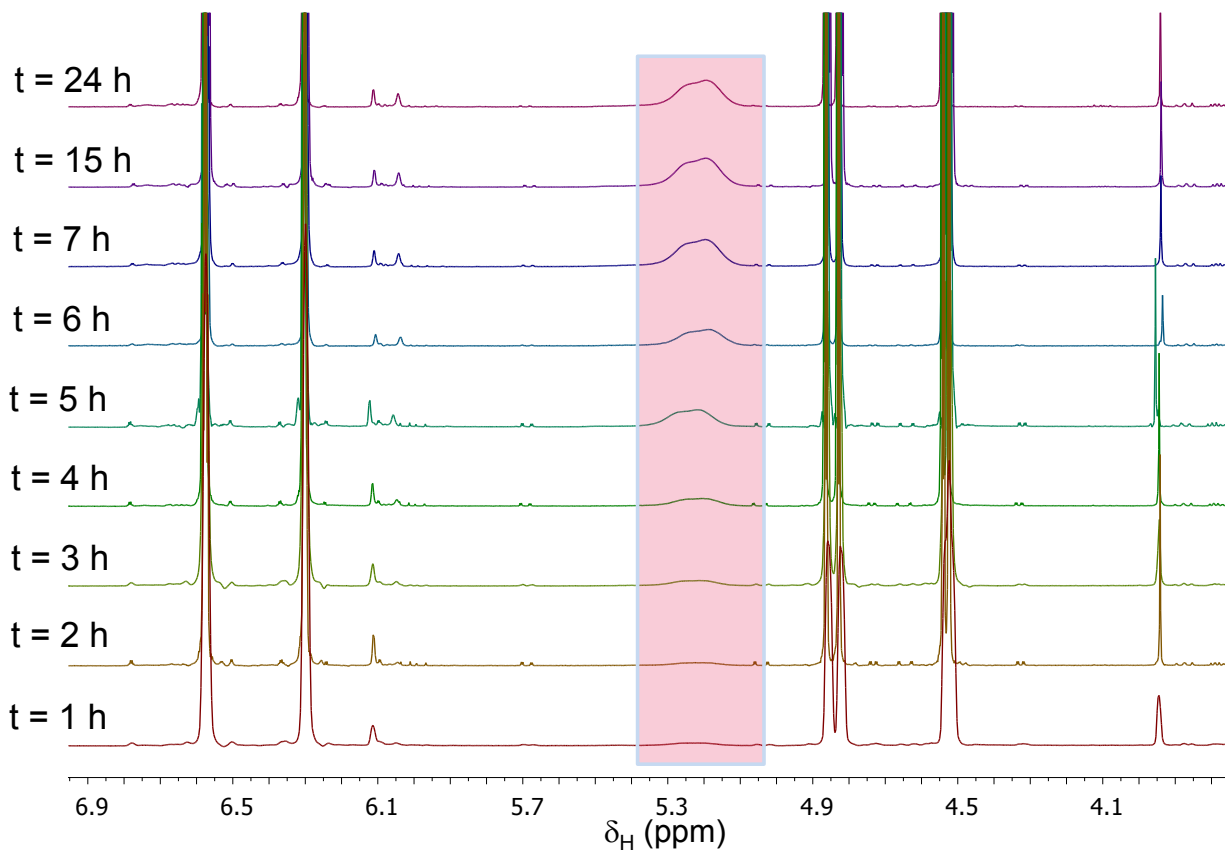

**Figure. S3** Evolution of the  $^1\text{H}$  NMR spectra (recorded in  $\text{CDCl}_3$ ,  $20^\circ\text{C}$ ) during the RAFT copolymerization of VAc and MAF-TBE ( $f_{\text{MAF-TBE}} = 0.5$ ) carried out at  $40^\circ\text{C}$  in bulk using V-70 as initiator in the presence of cyanomethyl-3,5-dimethyl 1H-pyrazole-1-carbodithioate (CDPCD) (Table S1).

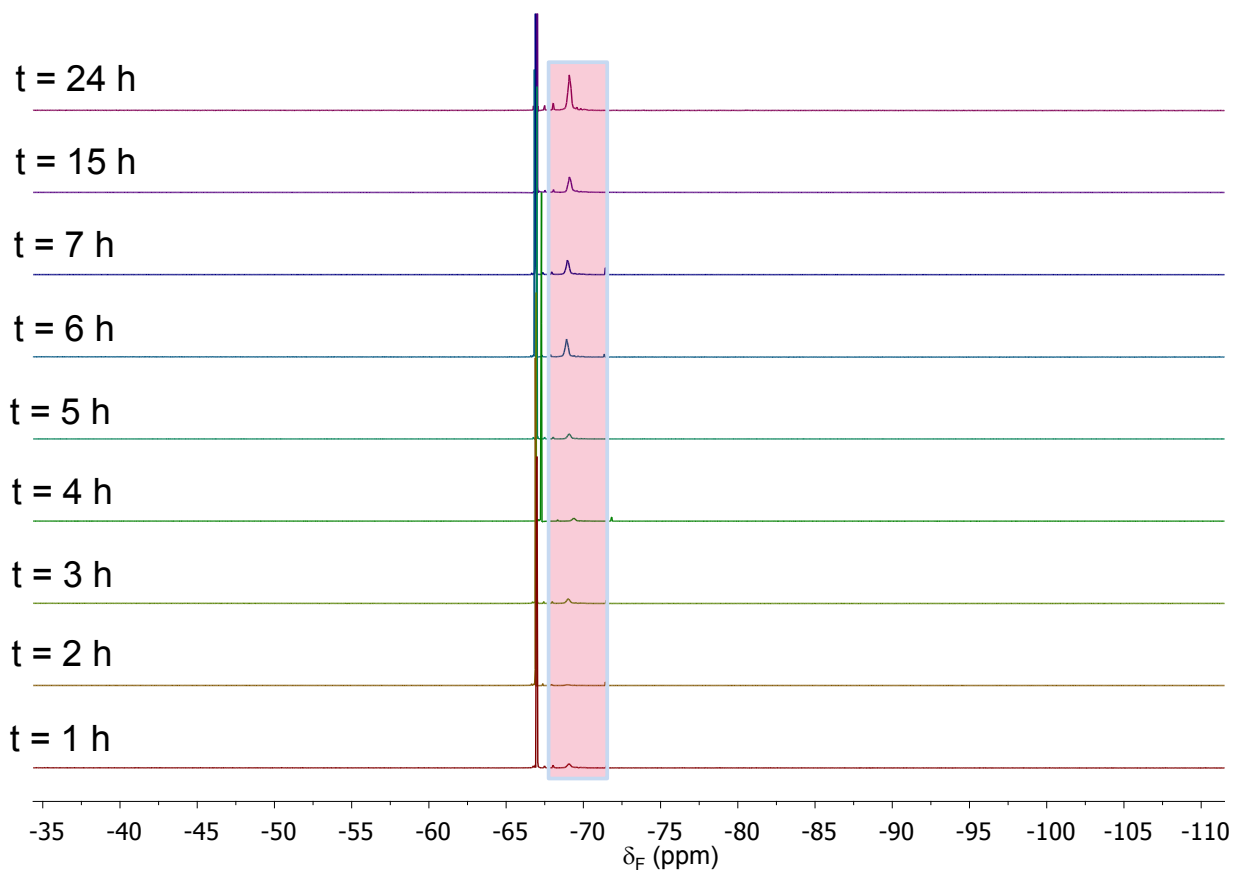

**Figure. S4** Evolution of the  $^{19}\text{F}$  NMR spectra ( $\text{CDCl}_3$ , 20 °C) during the RAFT copolymerization of VAc and MAF-TBE ( $f_{\text{MAF-TBE}} = 0.5$ ) carried out at 40 °C in bulk using V-70 as initiator in the presence of cyanomethyl-3,5-dimethyl 1H-pyrazole-1-carbodithioate (CDPCD) (Table S1).

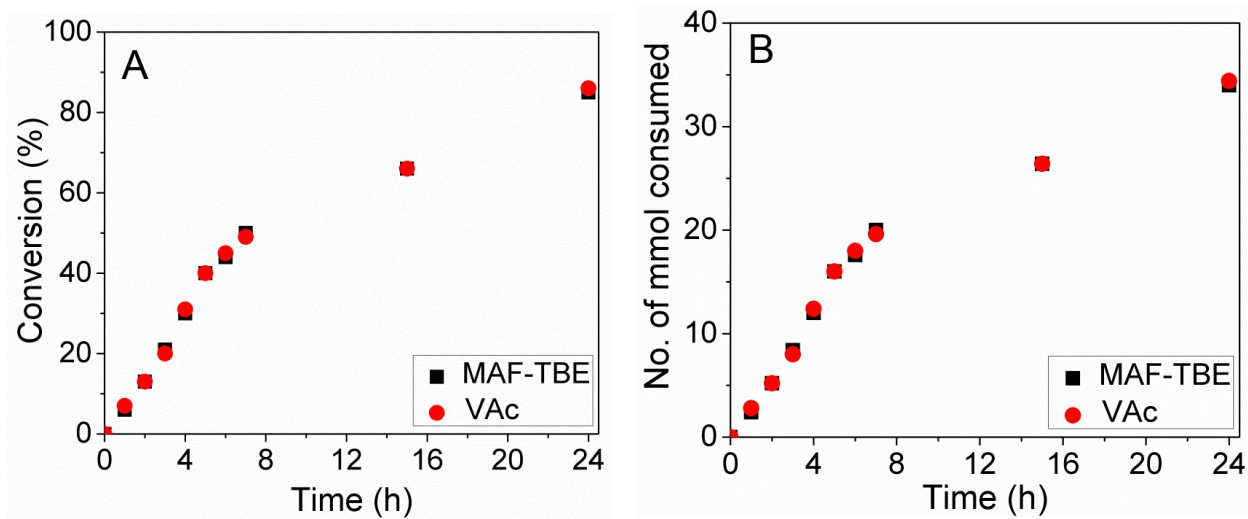

**Figure. S5** Conversion *vs* time plots of VAc and MAF-TBE during their RAFT copolymerization ( $f_{MAF-TBE} = 0.5$ ) carried out at 40 °C in bulk using V-70 as initiator in the presence of CDPCD: (A) conversion expressed in %, (B), conversion expressed in amount of mmol consumed.

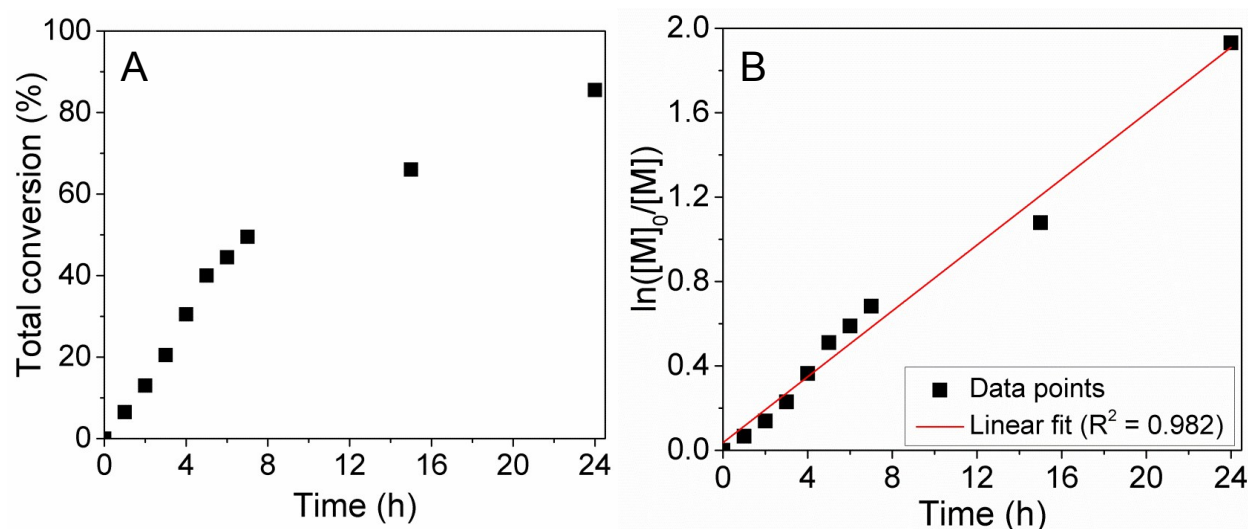

**Figure. S6** (A) Total conversion *vs* time and (B)  $\ln([M]_0/[M])$  *vs* time plot for the RAFT copolymerization of VAc and MAF-TBE ( $f_{MAF-TBE} = 0.5$ ) carried out at 40 °C in bulk using V-70 as initiator in the presence of CDPCD (Table S1).



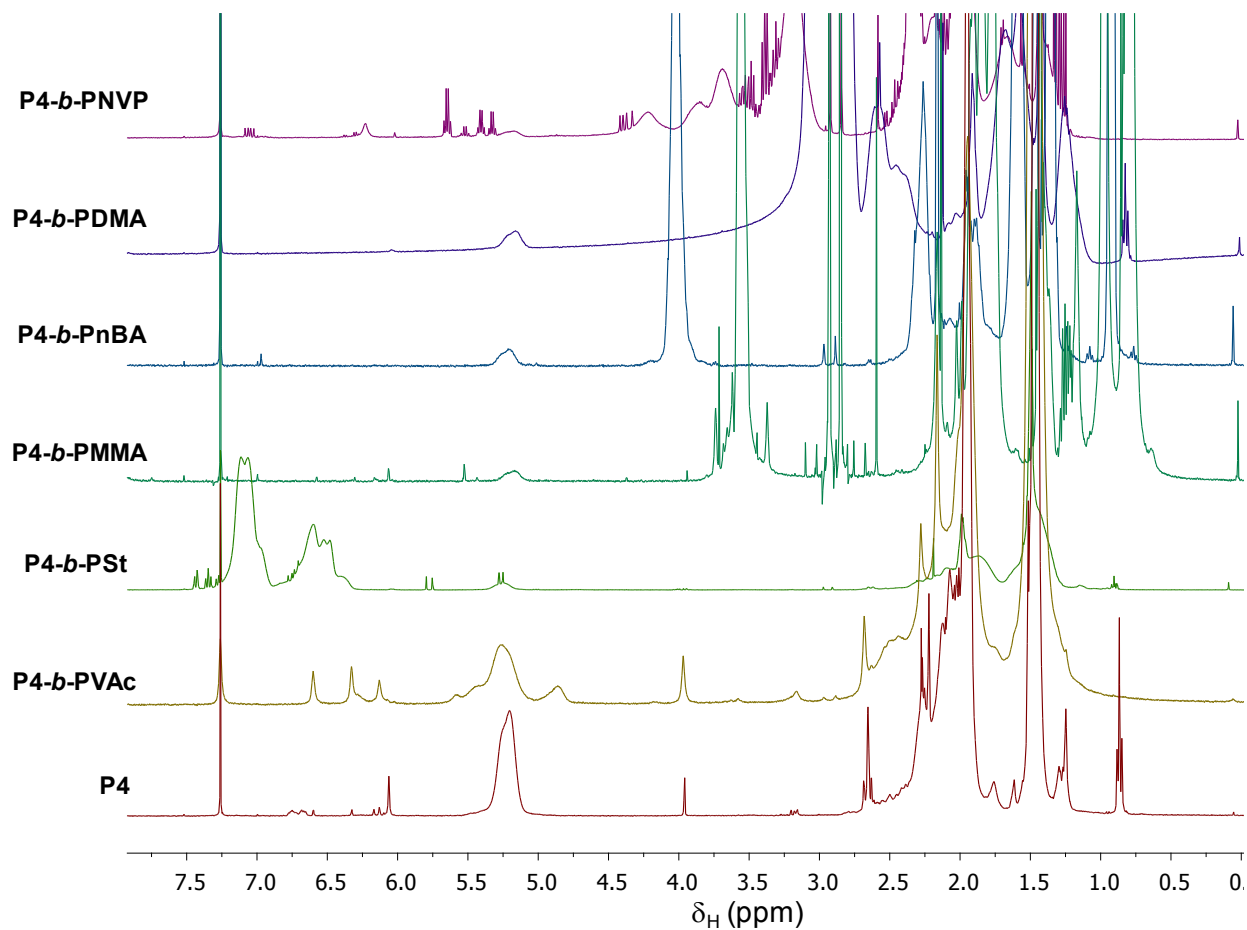

**Figure. S7** Expansion of the 0 to 7.5 ppm region of the  $^1\text{H}$  NMR spectra of poly(VAc-*alt*-MAF-TBE)-DPCD (P4, Table 1) and the derived block copolymers (P5-P10, Table 1), recorded in  $\text{CDCl}_3$  at 20  $^\circ\text{C}$ .

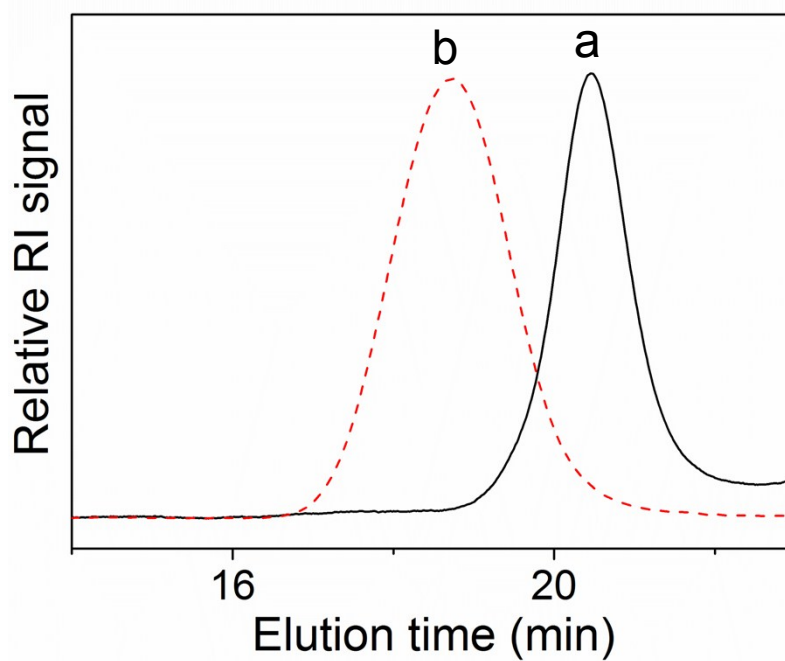

**Figure. S8** SEC traces of (a) PVAc-DPCD (P11, Table 1) and (b) the resulting PVAc-*b*-poly(VAc-*alt*-MAF-TBE) block copolymer (P17, Table 1).

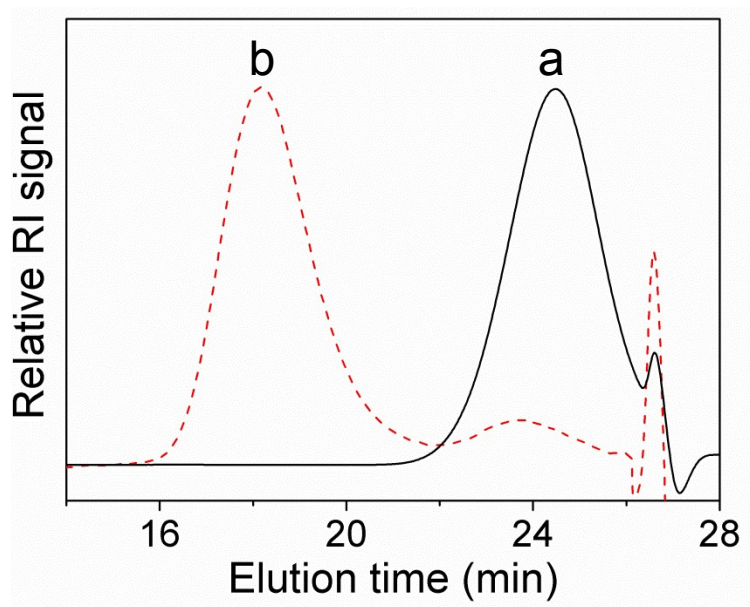

**Figure. S9** SEC traces of (a) PSt-DPCD (P12, Table 1) and (b) the derived PSt-*b*-poly(VAc-*alt*-MAF-TBE) block copolymer (P18, Table 1).

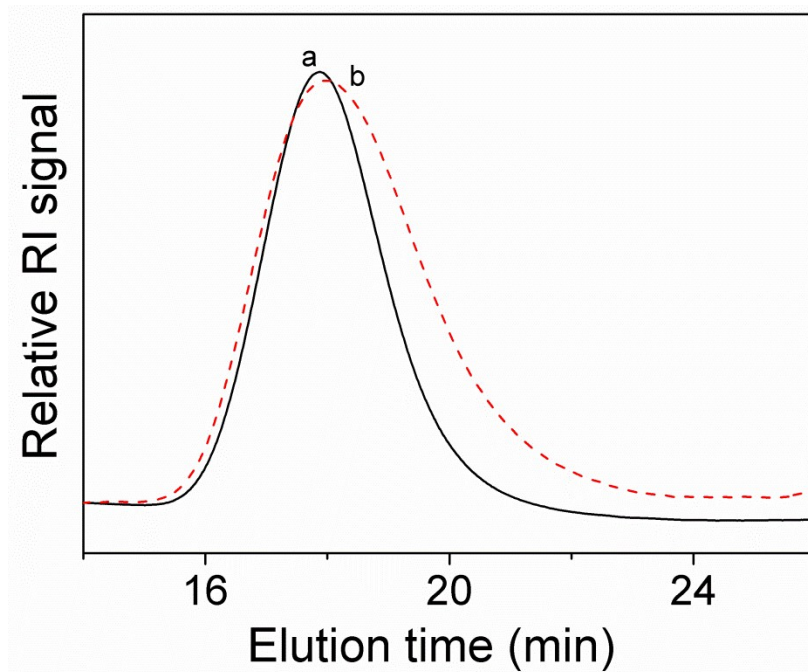

**Figure. S10** SEC traces of (a) PMMA-DPCD (P13, Table 1) and (b) the derived PMMA-*b*-poly(VAc-*alt*-MAF-TBE) block copolymer (P19, Table 1).

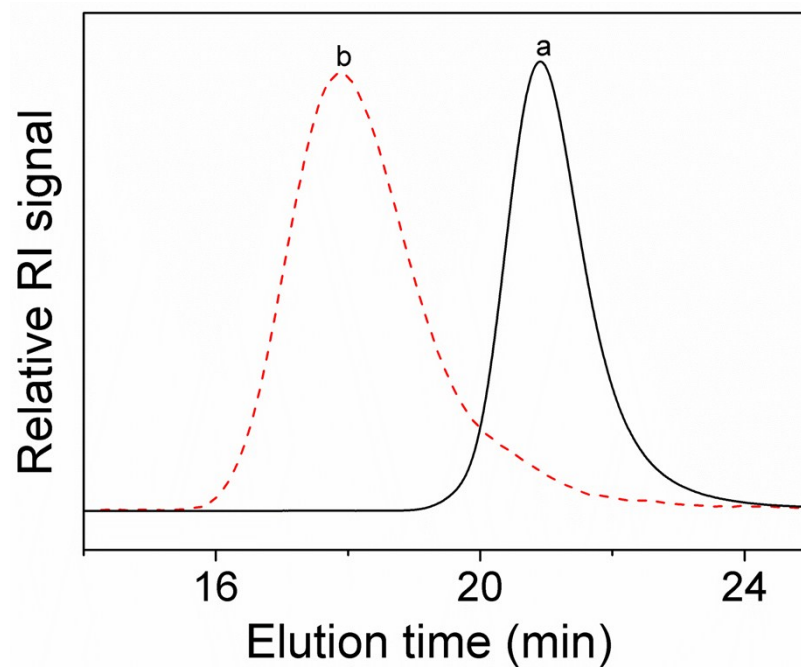

**Figure. S11** SEC traces of (a) PnBA-DPCD (P14, Table 1) and (b) the derived PnBA-*b*-poly(VAc-*alt*-MAF-TBE) block copolymer (P20, Table 1).

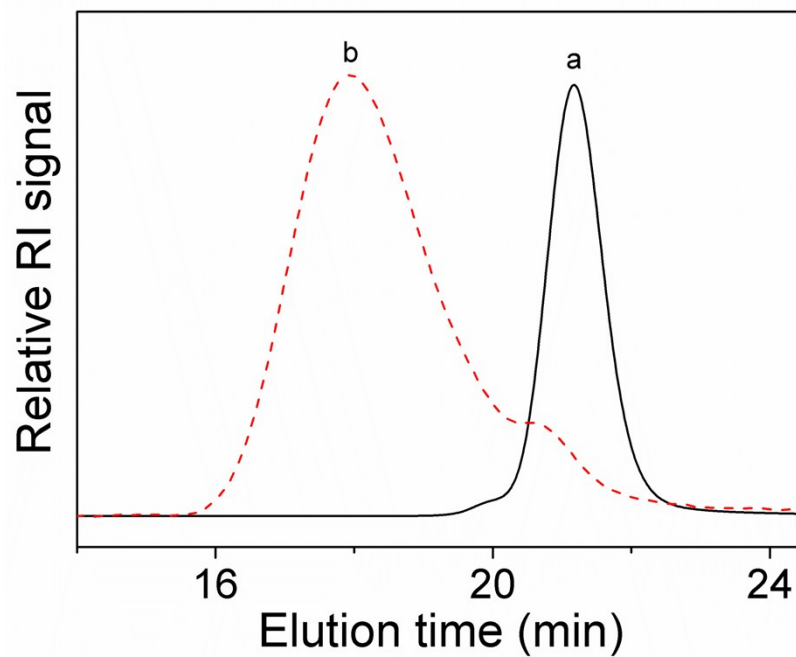

**Figure. S12** SEC traces of (a) PDMA-DPCD (P15, Table 1) and (b) the derived PDMA-*b*-poly(VAc-*alt*-MAF-TBE) block copolymer (P21, Table 1).

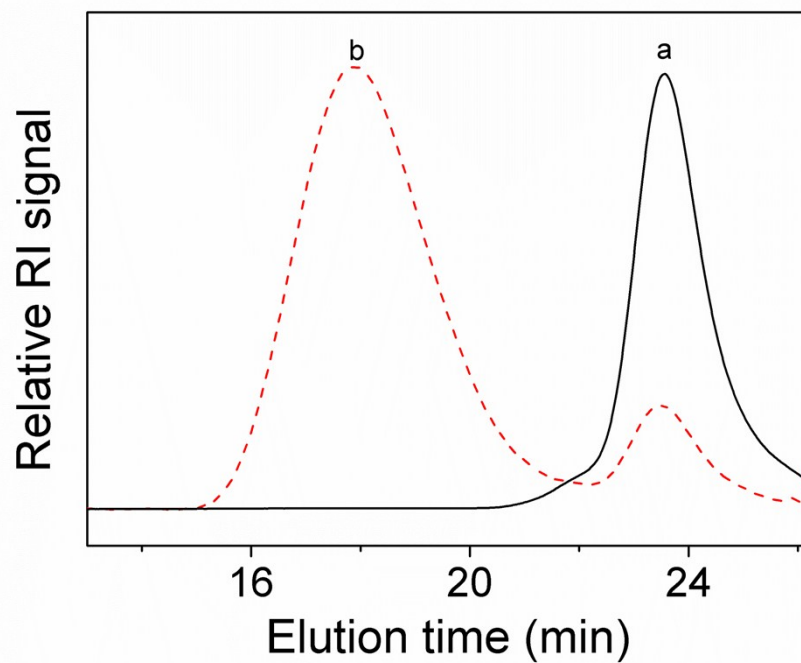

**Figure. S13** SEC traces of (a) PNVP-DPCD (P16, Table 1) and (b) the derived PNVP-*b*-poly(VAc-*alt*-MAF-TBE) block copolymer (P22, Table 1).

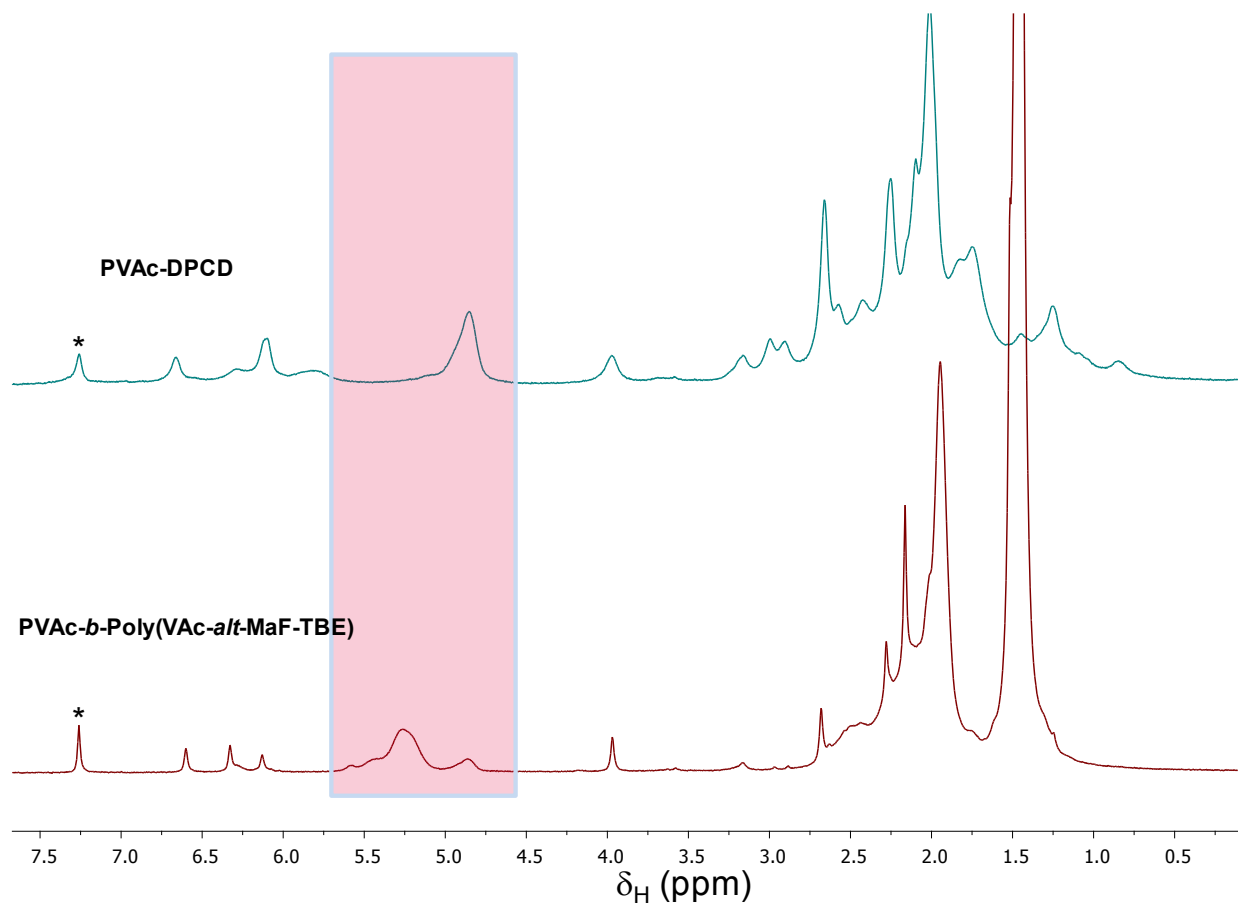

**Figure. S14** Expansion of the 0.5 to 7.5 ppm region of the  $^1\text{H}$  NMR spectra of PVAc-DPCD (P11, Table 1) and of the derived PVAc-*b*-poly(VAc-*alt*-MAF-TBE) block copolymer (P17, Table 1) recorded in  $\text{CDCl}_3$  at 20  $^\circ\text{C}$ .



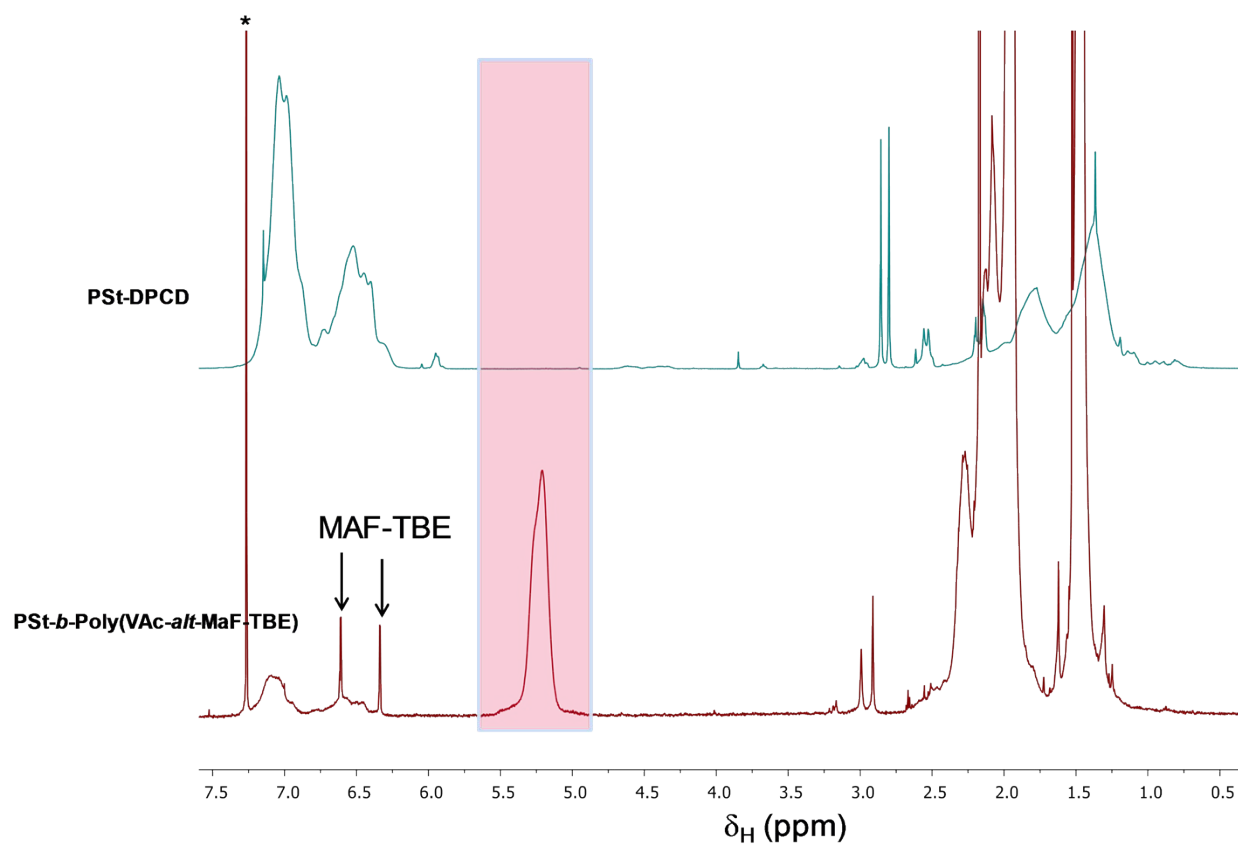

**Figure. S15** Expansion of the 0.5 to 7.5 ppm region of the  $^1\text{H}$  NMR spectra of PSt-DPCD (P12, Table 1) and of the derived PSt-*b*-poly(VAc-*alt*-MAF-TBE) block copolymer (P18, Table 1), recorded in  $\text{CDCl}_3$  20 °C. (\*) Solvent ( $\text{CDCl}_3$ ) peak.

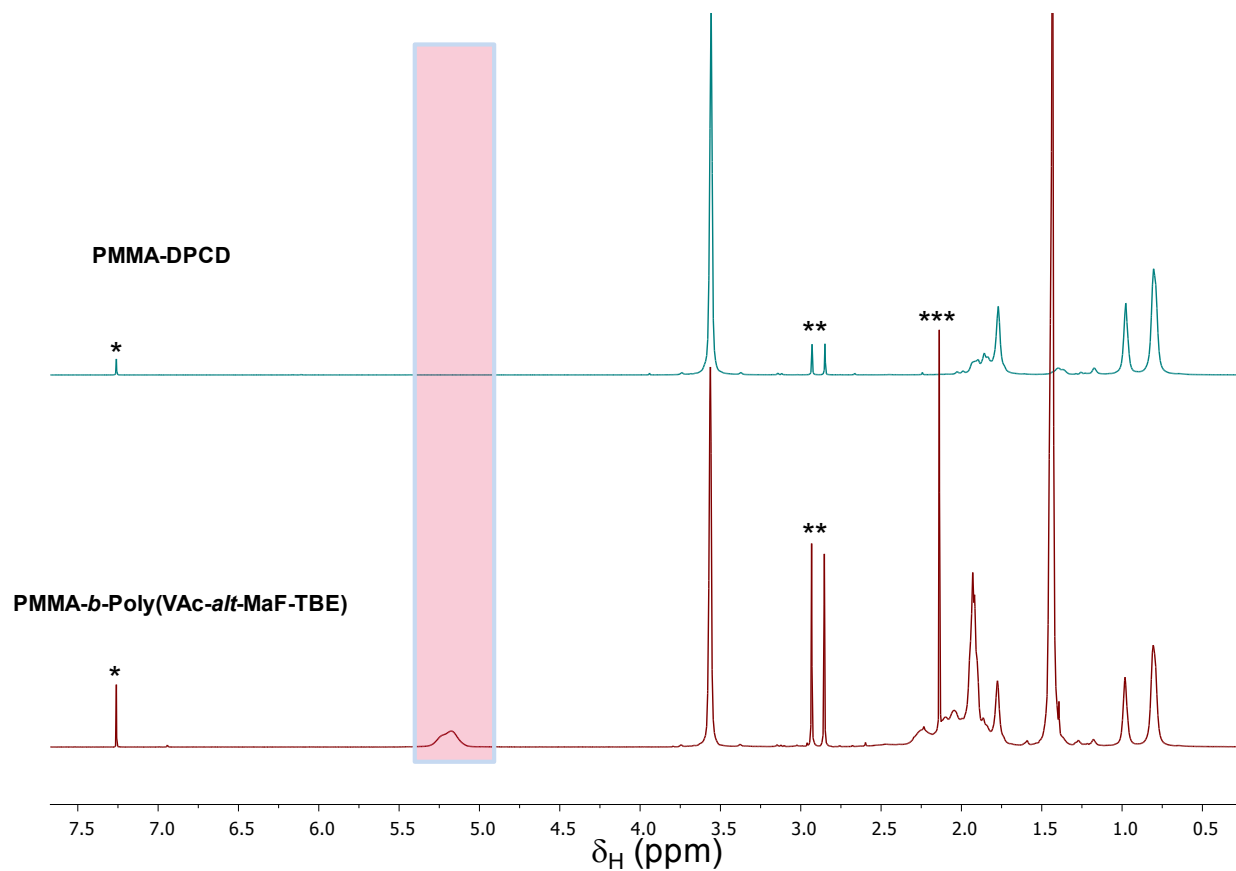

**Figure. S16** Expansion of the 0.5 to 7.5 ppm region of the  $^1\text{H}$  NMR spectra of PMMA-DPCD (P13, Table 1) and of the derived PMMA-*b*-poly(VAc-*alt*-MAF-TBE) block copolymer (P19, Table 1), recorded in  $\text{CDCl}_3$  20  $^\circ\text{C}$ . (\*) Solvent ( $\text{CDCl}_3$ ), (\*\*) solvent (DMF) and (\*\*\*) solvent (acetone) peaks.

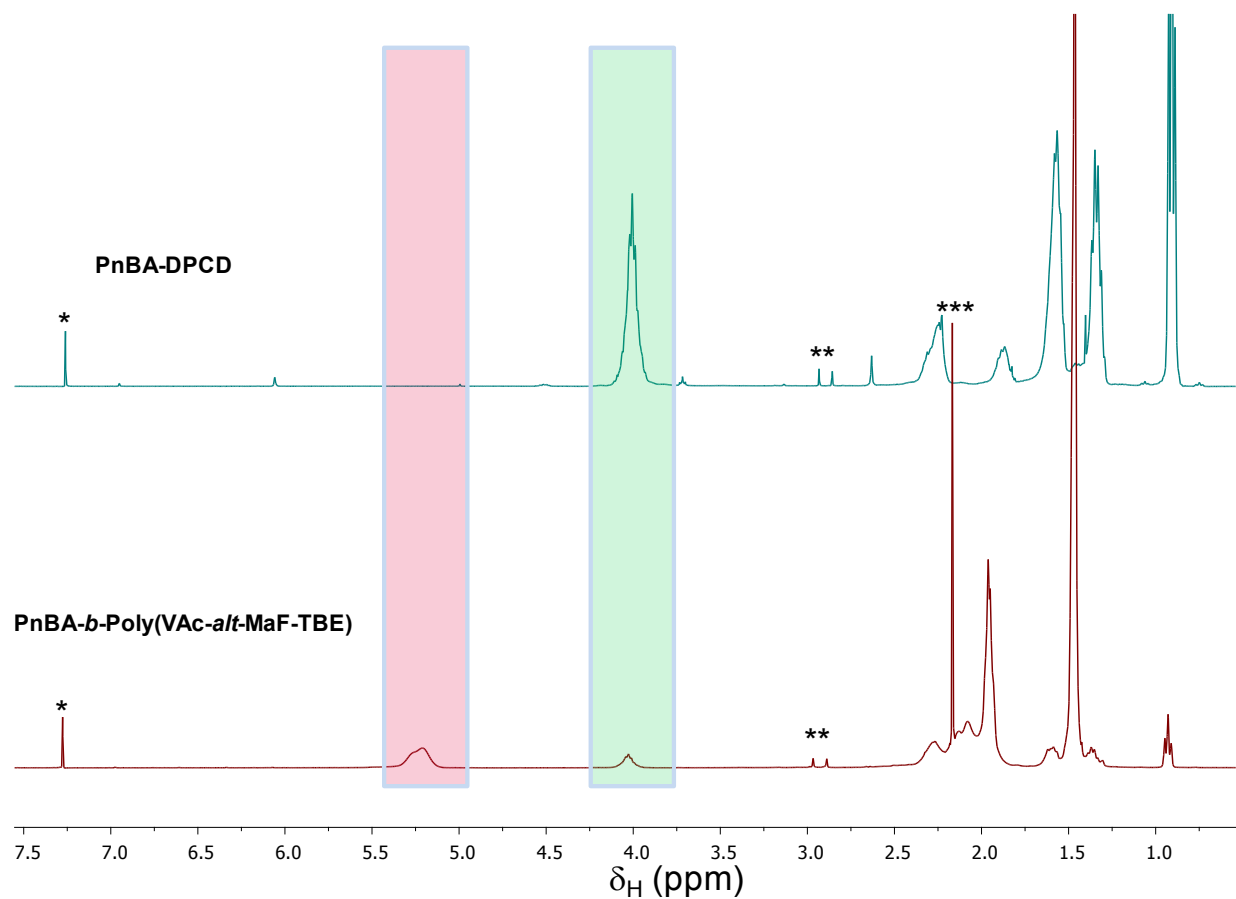

**Figure. S17** Expansion of the 0.5 to 7.5 ppm region of the  $^1\text{H}$  NMR spectra of PnBA-DPCD (P14, Table 1) and of the derived PnBA-*b*-poly(VAc-*alt*-MAF-TBE) block copolymer (P20, Table 1), recorded in  $\text{CDCl}_3$  20 °C. (\*) Solvent ( $\text{CDCl}_3$ ) (\*\*) solvent (DMF) and (\*\*\*) solvent (acetone) peaks.

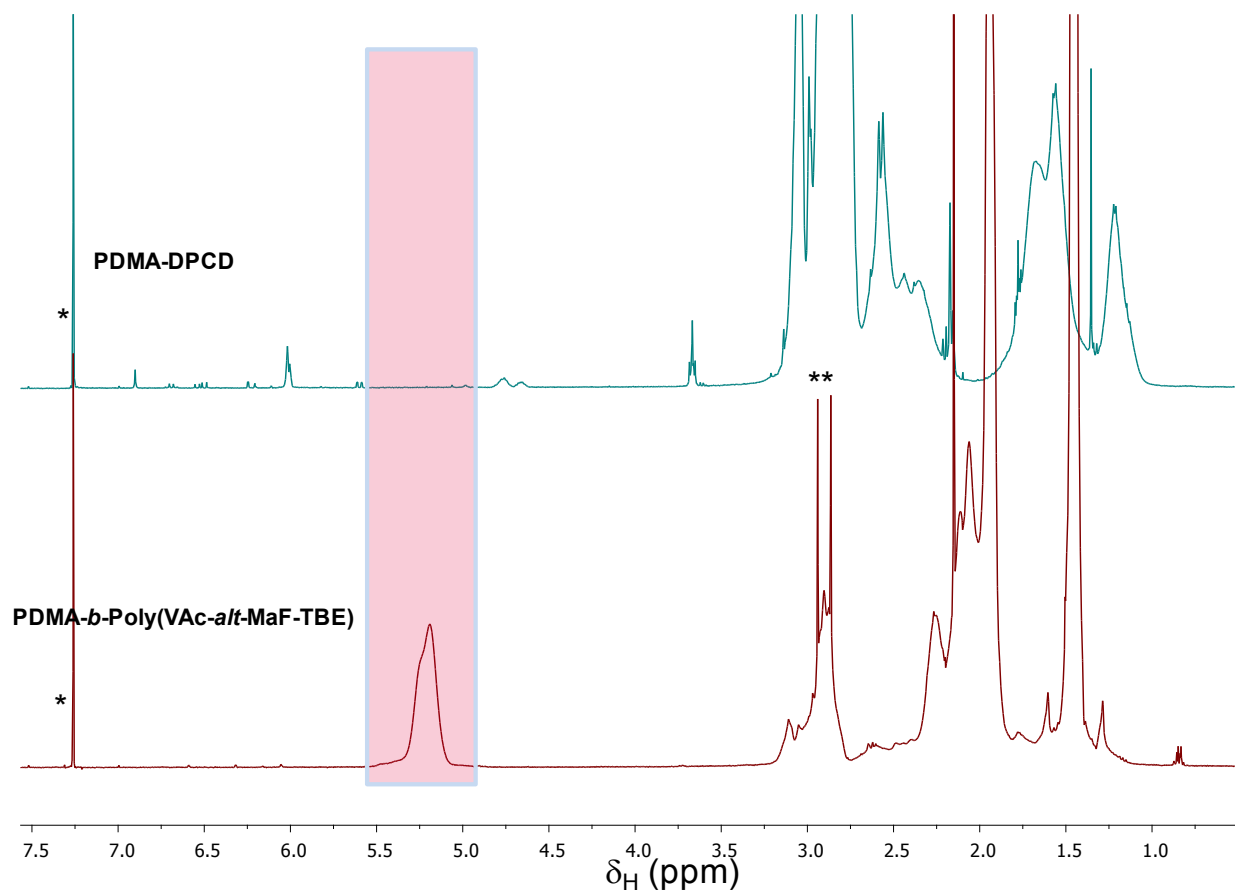

**Figure. S18** Expansion of the 0.5 to 7.5 ppm region of the  $^1\text{H}$  NMR spectra of PDMA-DPCD (P15, Table 1) and of the derived PDMA-*b*-poly(VAc-*alt*-MAF-TBE) block copolymer (P21, Table 1) recorded in  $\text{CDCl}_3$  20 °C. (\*) Solvent ( $\text{CDCl}_3$ ) and (\*\*) solvent (DMF) peaks.

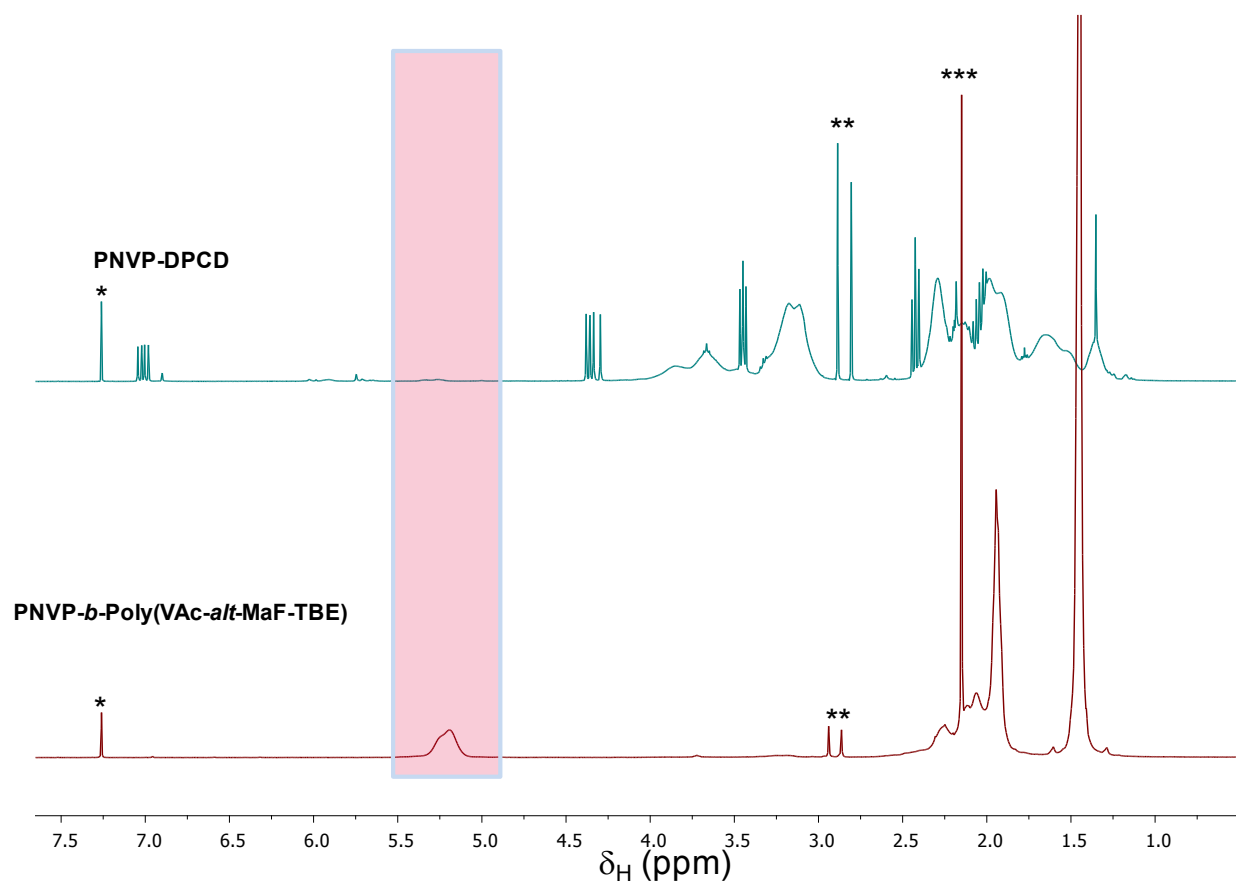

**Figure. S19** Expansion of the 0.5 to 7.5 ppm region of the  $^1\text{H}$  NMR spectra of PNVP-DPCD (P16, Table 1) and of the derived PNVP-*b*-poly(VAc-*alt*-MAF-TBE) block copolymer (P22, Table 1) recorded in  $\text{CDCl}_3$  20  $^\circ\text{C}$ . (\*) Solvent ( $\text{CDCl}_3$ ), (\*\*) solvent (DMF) and (\*\*\*) solvent (acetone) peak.
